# Supplementary material for: Potential use of superparamagnetic iron oxide nanoparticles for in vitro and in vivo bioimaging of human myoblasts
Source: Springer Nature journal article supplement (doi:10.1038/s41598-018-22018-0), 2018-02-21

**Potential use of superparamagnetic iron oxide nanoparticles for *in vitro* and *in vivo* bioimaging of human myoblasts.**

Kamil R. Wierzbinski<sup>1#</sup>, Tomasz Szymanski<sup>1,2,3#</sup>, Natalia Rozwadowska<sup>1</sup>, Jakub D. Rybka<sup>2,3</sup>, Agnieszka Zimna<sup>1</sup>, Tomasz Zalewski<sup>4</sup>, Karolina Nowicka-Bauer<sup>1</sup>, Agnieszka Malcher<sup>1</sup>, Magdalena Nowaczyk<sup>1</sup>, Michal Krupinski<sup>5</sup>, Michal Fiedorowicz<sup>6</sup>, Piotr Bogorodzki<sup>6</sup>, Pawel Grieb<sup>6</sup>, Michal Giersig<sup>2,3,7</sup>, Maciej K. Kurpisz<sup>1\*</sup>

<sup>1</sup> Institute of Human Genetics Polish Academy of Sciences, Poznan, Poland

<sup>2</sup> Faculty of Chemistry, Adam Mickiewicz University, Poznan, Poland

<sup>3</sup> Wielkopolska Centre of Advanced Technologies, Adam Mickiewicz University, Poznan, Poland

<sup>4</sup> NanoBioMedical Centre, Adam Mickiewicz University, Poznan, Poland

<sup>5</sup> The Henryk Niewodniczanski Institute, Institute of Nuclear Physics Polish Academy of Sciences, Cracow, Poland

<sup>6</sup> Mossakowski Medical Research Centre, Polish Academy of Sciences, Warsaw, Poland

<sup>7</sup> Institute of Experimental Physics, Freie Universität Berlin, Berlin, Germany

# Both authors equally contributed to the study

\*Corresponding Author

Maciej K. Kurpisz MD PhD,

Institute of Human Genetics,

Polish Academy of Sciences, Poznan, Poland

e-mail: kurpimac@man.poznan.pl

**Supplementary Figure S1:** Diagrams representing results of ICP-MS analysis. **A-B** – iron concentrations in standard solutions of SPIONs in cell lysates. **C-D** – iron concentrations in SPION-treated cell lysates. **E-F** – calculated amounts of iron per single cell. Abbreviations: ICP-MS – inductively coupled plasma mass spectrometry. Asterisks indicate statistical significance (\*\*  $p < 0.01$ ; \*\*\*  $p < 0.001$ ).

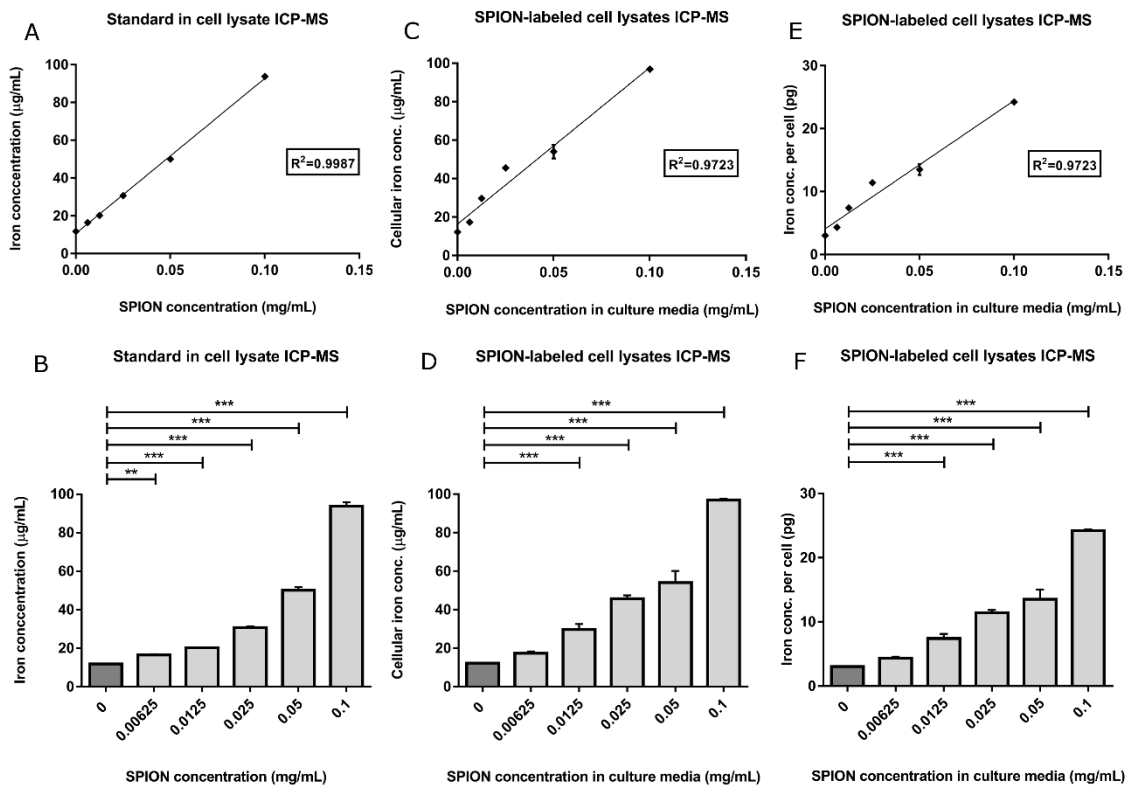

Supplement: MOESM1 [file 41598_2018_22018_MOESM1_ESM.pdf]
